# Supplementary material for: Oxidation and removal of As(iii) from soil using novel magnetic nanocomposite derived from biomass waste
Source: Royal Society of Chemistry journal article supplement (doi:10.1039/c8en01257a), 2019-01-01
Supplement: c8en01257a1.pdf [file c8en01257a1.pdf]

*Supporting information for*

**The oxidation and removal of As(III) from soil using a novel magnetic nanocomposite derived-biomass wastes**

Jianghu Cui<sup>†,1</sup>, Qian Jin<sup>‡,1</sup>, Yadong Li<sup>†</sup>, Fangbai Li<sup>†,\*</sup>

*†Guangdong Key Laboratory of Integrated Agro-environmental Pollution Control and Management, Guangdong Institute of Eco-environmental Science & Technology, Guangzhou 510650, China*

*‡ College of Agriculture, Shihezi University, Shihezi 832000, Xinjiang, China*

\* Corresponding author. Tel.: +86 20 37021396.

*E-mail address: [cefbli@soil.gd.cn](mailto:cefbli@soil.gd.cn) (F.B.Li)*

<sup>1</sup> Jianghu Cui and Qian Jin contributed equally to this work.

---

**Fabrication of BMN-loaded sponges:** A piece of commercially available sponge (density of  $0.018 \text{ g cm}^{-3}$ , 60 pores per linear inch, Shanghai Caili Trade Co., Ltd.) was washed with distilled water and acetone several times and dried at  $80 \text{ }^{\circ}\text{C}$ . The sponge was then cut into small sponge particles (diameter of 2 mm). 10 mg sponge particles were dipped into BMN powder (80-100 mesh) to coat BMN particles to the sponge skeletons. Subsequently, the BMN-loaded sponges were immersed into a dilute solution of polydimethylsiloxane in toluene ( $0.25 \text{ mg mL}^{-1}$ ), and dried in an oven at  $80 \text{ }^{\circ}\text{C}$  for 12 h.

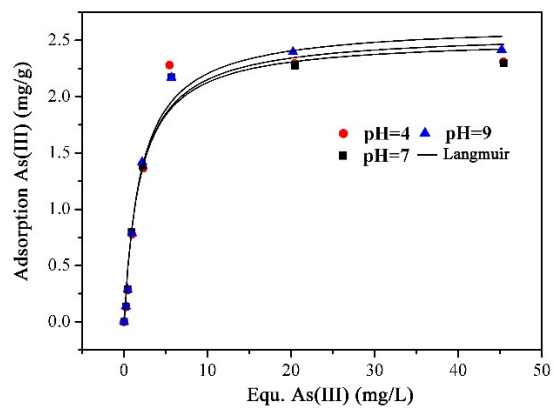

**Figure S1.** Adsorption isotherms of As(III) on the precursor at different pH (pH=4.0, 7.0 and 9.0).

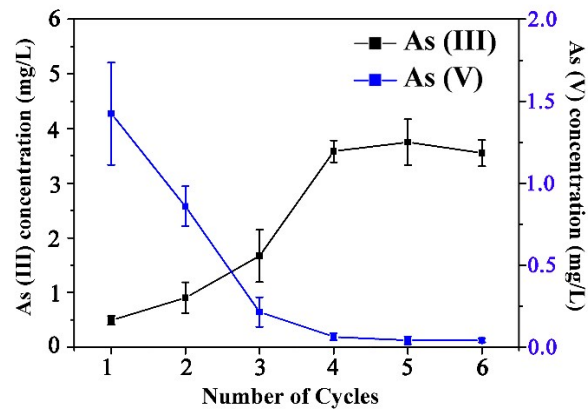

**Figure S2.** Influence of the recycling and reuse of BMN on the concentration of As(III) and As(V) in the desorption experiments.

---

**Table S1.** Langmuir and Freundlich models for As (III) adsorption isotherms

| pH  | Langmuir constants           |        |       | Freundlich constants |        |        |
|-----|------------------------------|--------|-------|----------------------|--------|--------|
|     | $Q_{\max}(\text{mg g}^{-1})$ | b      | $R^2$ | $K_f$                | n      | $R^2$  |
| 4.0 | 15.605                       | 0.0694 | 0.991 | 1.4696               | 2.4931 | 0.8477 |
| 7.0 | 16.223                       | 0.0809 | 0.993 | 1.5343               | 2.4820 | 0.855  |
| 9.0 | 10.918                       | 0.2115 | 0.983 | 1.4568               | 3.0572 | 0.9134 |

---

**Table S2.** Pseudo-second-order model for As(III) adsorption kinetics

| Adsorbent/Adsorbate | C <sub>0</sub> | Pseudo second order model               |                                                           |                |
|---------------------|----------------|-----------------------------------------|-----------------------------------------------------------|----------------|
|                     |                | q <sub>e</sub><br>(mg g <sup>-1</sup> ) | K <sub>2</sub><br>(g mg <sup>-1</sup> min <sup>-1</sup> ) | R <sup>2</sup> |
| BMN/As(III)         | 5.0            | 1.0452                                  | 0.9155                                                    | 0.9469         |
|                     | 10.0           | 1.5097                                  | 0.4388                                                    | 0.9959         |
|                     | 15.0           | 2.2311                                  | 0.2009                                                    | 0.9923         |
|                     | 20.0           | 3.2680                                  | 0.0936                                                    | 0.9902         |

---
